# Supplementary material
Source: Springer Nature journal article supplement (https://www.springermedizin.de/resource/supplementary/13019_2009_214_MOESM4_ESM.pdf/9638090)

mg/dl

# Serum Ca

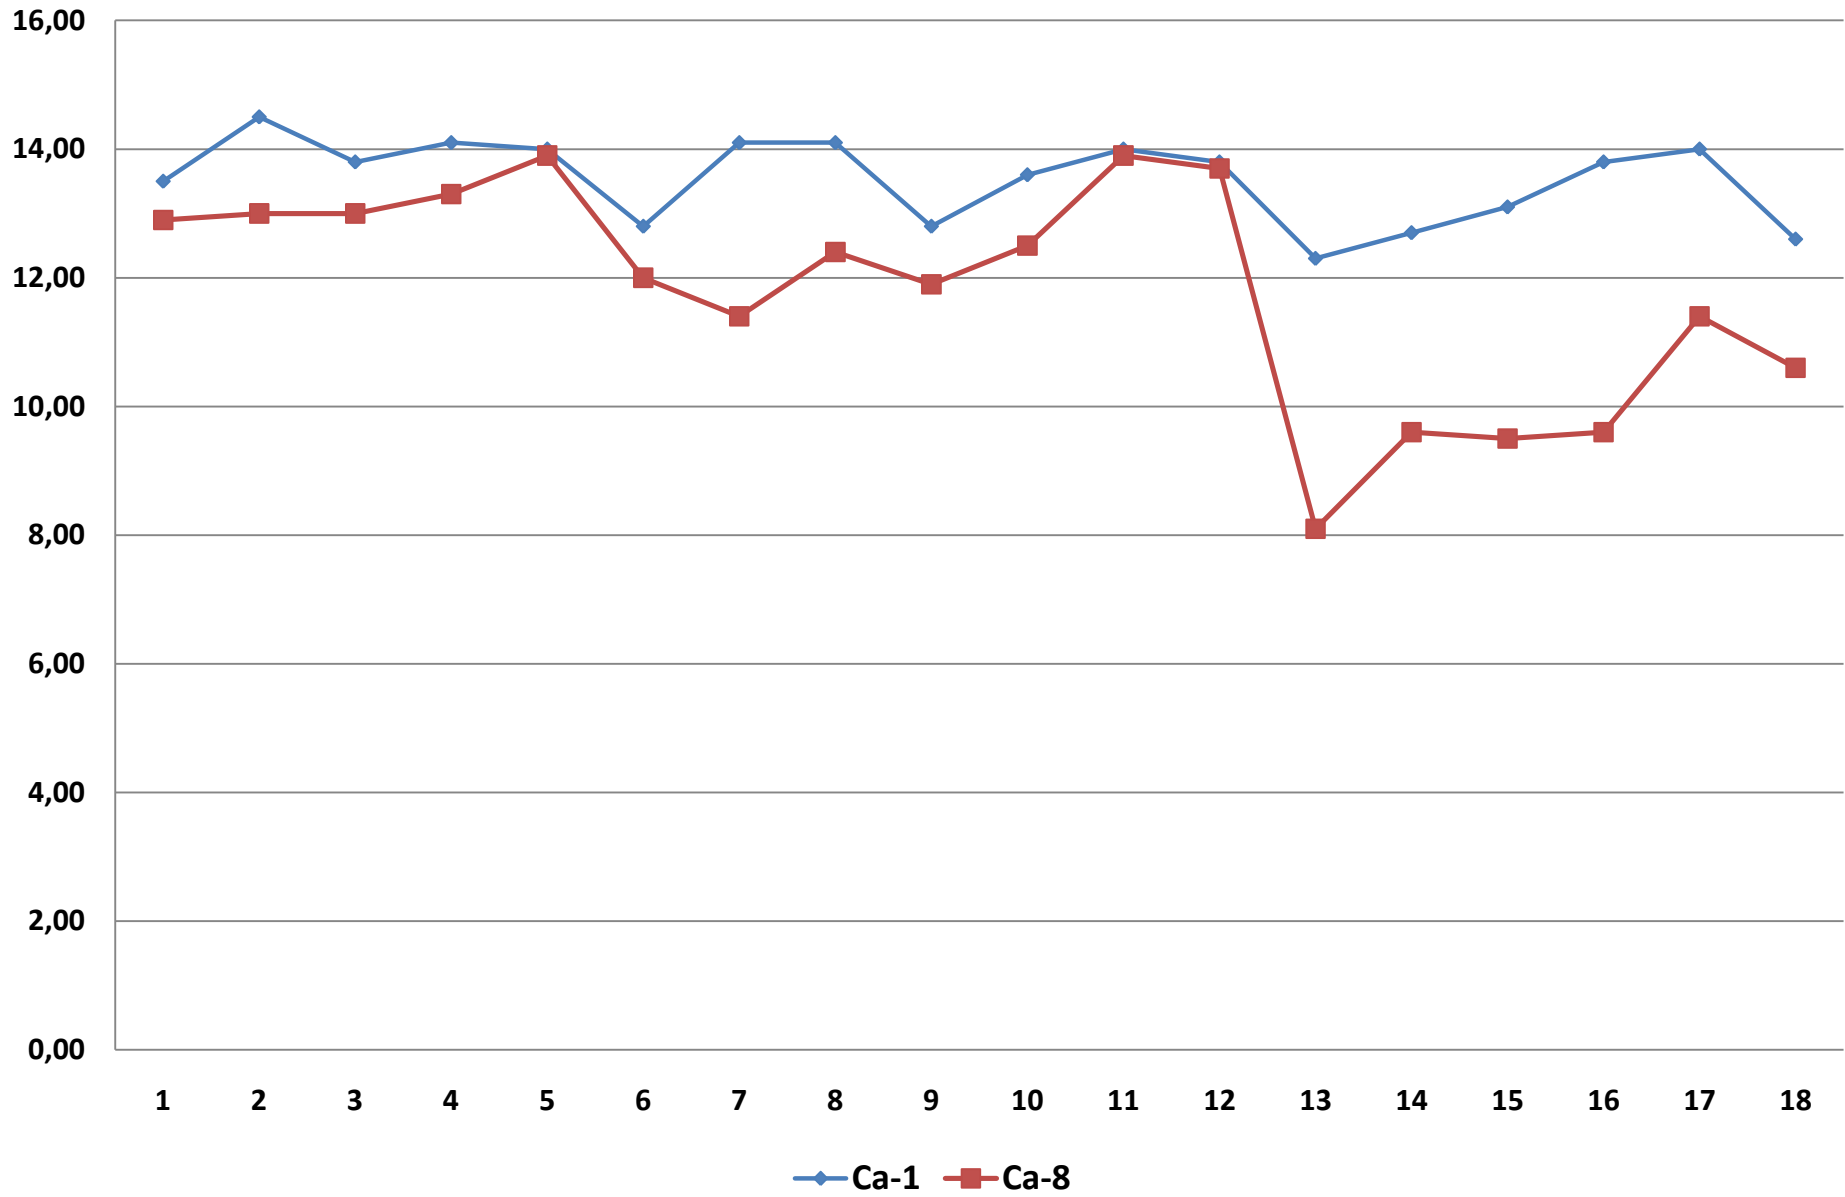

Supplement: MOESM4 [file 9638090]
